# Supplementary material
Source: PubMed Central journal article supplement (PMC5409464)
Supplement: 10.1074_M117.776468_jbc.M117.776468-1.pdf [file 10.1074_M117.776468_jbc.M117.776468-1.pdf]

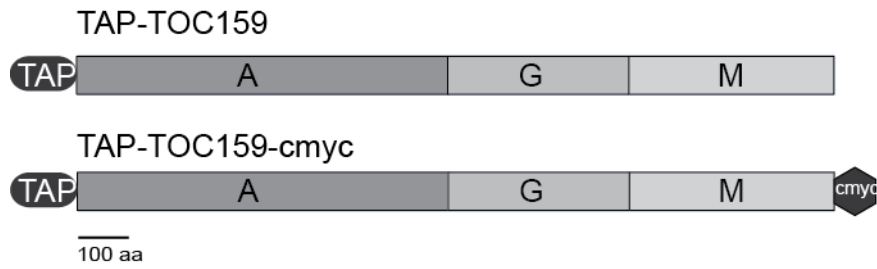

Figure S2.

**FIGURE S2.** NTAP-TOC159 constructs. Schematic representation of TAP-TOC159 and TAP-TOC159-cmyc constructs. The domains of TOC159 are illustrated: the N-terminal A domain, G domain and M domain.

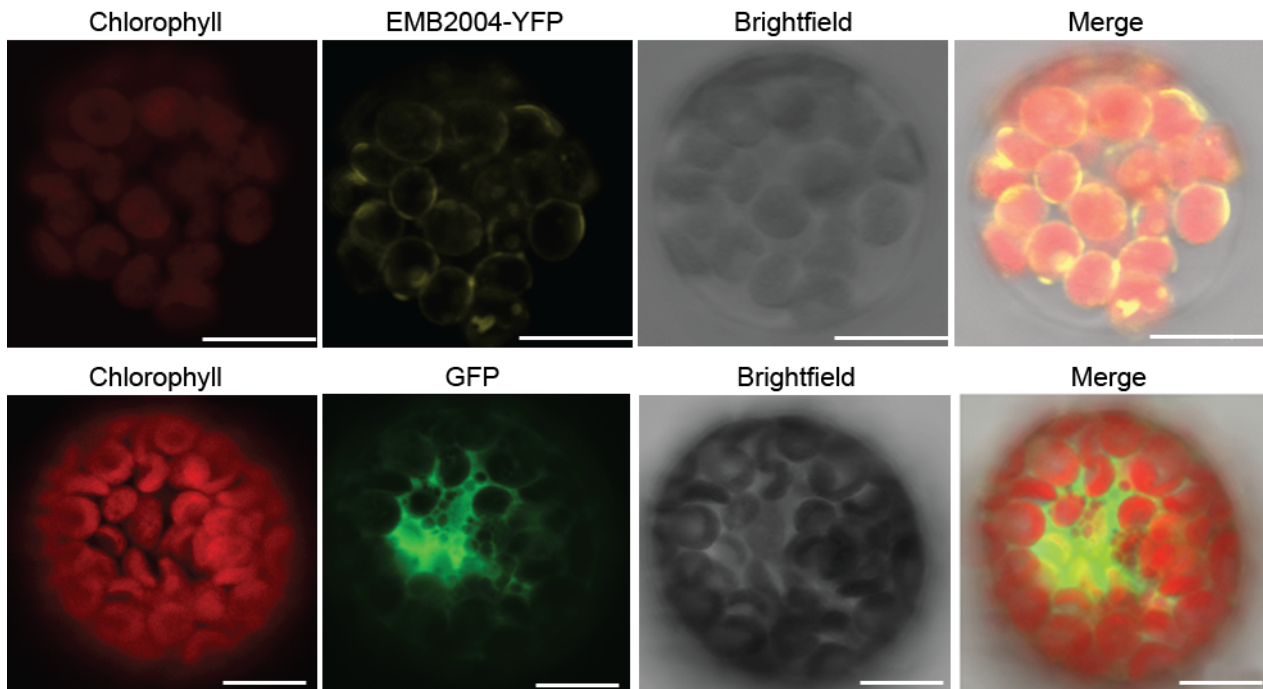

Figure S3.

**FIGURE S3.** Confocal microscopy images of an isolated representative protoplast expressing EMB2004-YFP and GFP. Chlorophyll fluorescence visualized in red identifying chloroplasts, EMB2004-YFP appears yellow, GFP in green. Intact protoplasts were visualized by bright field. Merge shows the overlay of chlorophyll, fluorescence of proteins and bright field images. Scale bars: 10 $\mu$ m.

| Identifier | Annotation                                                                                                                                                                                                                                                      | fmol on column (negative control, replicate 1) | fmol on column (eluate, replicate 1) | fmol on column (negative control, replicate 2) | fmol on column (eluate, replicate 2) | Complete chloroplast reference | Complete chloroplast reference (fmol) | Enrichment index 1st replicate | Enrichment index 2nd replicate | avg enrichment index | avg fmol in eluate | % of bait  |
|------------|-----------------------------------------------------------------------------------------------------------------------------------------------------------------------------------------------------------------------------------------------------------------|------------------------------------------------|--------------------------------------|------------------------------------------------|--------------------------------------|--------------------------------|---------------------------------------|--------------------------------|--------------------------------|----------------------|--------------------|------------|
| AT4G32250  | Protein kinase superfamily protein; FUNCTIONS IN: protein kinase activity, kinase activity, ATP binding; INVOLVED IN: protein amino acid phosphorylation; LOCATED IN: chloroplast;                                                                              | 0.6261333333                                   | 34.9472                              | 0.3351666667                                   | 10.9877                              | not detected                   | n.a.                                  | n.a.                           | n.a.                           | infinite             | 22.96745           | 100        |
| AT4G02510  | An integral membrane GTPase that functions as a transit-sequence receptor required for the import of proteins necessary for chloroplast biogenesis. Located in the outer chloroplast membrane.                                                                  | N.D.                                           | 6.4308                               | N.D.                                           | 1.45093333                           | not detected                   | n.a.                                  | n.a.                           | n.a.                           | infinite             | 3.94086667         | 17.1584859 |
| AT5G53170  | encodes an FtsH protease that is localized to the chloroplast and the mitochondrion                                                                                                                                                                             | N.D.                                           | 1.05953333                           | N.D.                                           | 2.45403333                           | not detected                   | n.a.                                  | n.a.                           | n.a.                           | infinite             | 1.75678333         | 7.64901342 |
| AT1G22530  | PATELLIN 2 (PATL2); FUNCTIONS IN: transporter activity; INVOLVED IN: transport; LOCATED IN: plasma membrane, chloroplast                                                                                                                                        | N.D.                                           | 1.61993333                           | N.D.                                           | 1.7089                               | not detected                   | n.a.                                  | n.a.                           | n.a.                           | infinite             | 1.66441667         | 7.24685007 |
| AT5G13490  | Encodes mitochondrial ADP/ATP carrier                                                                                                                                                                                                                           | N.D.                                           | 2.2424                               | N.D.                                           | 0.9345                               | not detected                   | n.a.                                  | n.a.                           | n.a.                           | infinite             | 1.58845            | 6.91609212 |
| AT4G17530  | AtRabD2c encodes a Rab GTPase, which plays important roles in pollen development, germination and tube elongation.                                                                                                                                              | N.D.                                           | 2.14786667                           | N.D.                                           | 0.4689                               | not detected                   | n.a.                                  | n.a.                           | n.a.                           | infinite             | 1.30838333         | 5.69668524 |
| AT2G41840  | Ribosomal protein S5 family protein; FUNCTIONS IN: structural constituent of ribosome; INVOLVED IN: translation; LOCATED IN: cytosolic small ribosomal subunit, cytosolic ribosome, nucleolus, membrane                                                         | N.D.                                           | 2.6055                               | N.D.                                           |                                      | not detected                   | n.a.                                  | n.a.                           | n.a.                           | infinite             | 1.30275            | 5.67215777 |
| AT5G22640  | EMB1211 is a MORN (multiple membrane occupation and recognition nexus) motif containing protein involved in embryo development and chloroplast biogenesis. The mRNA is cell-to-cell mobile.                                                                     | N.D.                                           | 1.74823333                           | N.D.                                           | 0.74466667                           | not detected                   | n.a.                                  | n.a.                           | n.a.                           | infinite             | 1.24645            | 5.42702825 |
| AT2G36170  | Ubiquitin supergroup; Ribosomal protein L40e; FUNCTIONS IN: structural constituent of ribosome; INVOLVED IN: translation; LOCATED IN: cytosolic large ribosomal subunit, nucleolus;                                                                             | N.D.                                           | 1.76756667                           | N.D.                                           | 0.56953333                           | not detected                   | n.a.                                  | n.a.                           | n.a.                           | infinite             | 1.16855            | 5.08785259 |
| AT1G72150  | novel cell-plate-associated protein that is related in sequence to proteins involved in membrane trafficking in other eukaryotes The mRNA is cell-to-cell mobile.                                                                                               | N.D.                                           | 1.2719                               | N.D.                                           | 1.01236667                           | not detected                   | n.a.                                  | n.a.                           | n.a.                           | infinite             | 1.14213333         | 4.97283474 |
| AT3G05590  | Encodes cytoplasmic ribosomal protein L18.                                                                                                                                                                                                                      | N.D.                                           | 0.47013333                           | N.D.                                           | 1.681                                | not detected                   | n.a.                                  | n.a.                           | n.a.                           | infinite             | 1.07556667         | 4.68300428 |
| AT5G57350  | member of Plasma membrane H+ATPase family                                                                                                                                                                                                                       | N.D.                                           | 2.0477                               | N.D.                                           |                                      | not detected                   | n.a.                                  | n.a.                           | n.a.                           | infinite             | 1.02385            | 4.45783054 |
| AT3G19820  | Involved in the conversion of the early brassinosteroid precursor 24-methylenecholesterol to campesterol. Brassinosteroids affect cellular elongation. Mutants have dwarf phenotype. DWF1 is a Ca2+ dependent calmodulin-binding protein.                       | N.D.                                           | 1.804                                | N.D.                                           | 0.23593333                           | not detected                   | n.a.                                  | n.a.                           | n.a.                           | infinite             | 1.01996667         | 4.44092255 |
| AT1G22780  | S18 ribosomal protein involved in the binding of f-Met tRNA during initiation of mRNA translation. Expression restricted to meristems. Mutant phenotype-pointed first leaves, reduced fresh weight, growth retardation.                                         | N.D.                                           | 1.60403333                           | N.D.                                           | 0.34843333                           | not detected                   | n.a.                                  | n.a.                           | n.a.                           | infinite             | 0.97623333         | 4.25050815 |
| AT2G45820  | Remorin family protein; FUNCTIONS IN: DNA binding; INVOLVED IN: biological_process unknown; LOCATED IN: plasma membrane;                                                                                                                                        | N.D.                                           | 1.3562                               | N.D.                                           | 0.58653333                           | not detected                   | n.a.                                  | n.a.                           | n.a.                           | infinite             | 0.97136667         | 4.22931874 |
| ATMG01190  | ATPase subunit 1                                                                                                                                                                                                                                                | N.D.                                           | 1.4399                               | N.D.                                           | 0.37563333                           | not detected                   | n.a.                                  | n.a.                           | n.a.                           | infinite             | 0.90776667         | 3.95240511 |
| AT1G33120  | Ribosomal protein L6 family; FUNCTIONS IN: structural constituent of ribosome, rRNA binding; INVOLVED IN: translation; LOCATED IN: 7 components                                                                                                                 | N.D.                                           | 1.51756667                           | N.D.                                           | 0.19406667                           | not detected                   | n.a.                                  | n.a.                           | n.a.                           | infinite             | 0.85581667         | 3.72621543 |
| AT3G04340  | embryo defective 2458 (emb2458); FUNCTIONS IN: nucleoside-triphosphatase activity, ATPase activity, metalloendopeptidase activity, nucleotide binding, ATP binding; INVOLVED IN: embryo development ending in seed dormancy; LOCATED IN: chloroplast            | N.D.                                           | 1.14196667                           | N.D.                                           | 0.2685                               | not detected                   | n.a.                                  | n.a.                           | n.a.                           | infinite             | 0.70523333         | 3.07057742 |
| AT1G79560  | Encodes an FtsH protease that is localized to the chloroplast. Mutations in this locus result in embryo lethality.                                                                                                                                              | N.D.                                           | 1.09513333                           | N.D.                                           | 0.30153333                           | not detected                   | n.a.                                  | n.a.                           | n.a.                           | infinite             | 0.69833333         | 3.0405349  |
| AT5G43745  | Protein of unknown function (DUF1012); LOCATED IN: chloroplast, chloroplast envelope;                                                                                                                                                                           | N.D.                                           | 0.8634                               | N.D.                                           | 0.4881                               | not detected                   | n.a.                                  | n.a.                           | n.a.                           | infinite             | 0.67575            | 2.94220734 |
| AT5G22830  | Transmembrane magnesium transporter. One of nine family members.                                                                                                                                                                                                | N.D.                                           | 0.975                                | N.D.                                           | 0.3706                               | not detected                   | n.a.                                  | n.a.                           | n.a.                           | infinite             | 0.6728             | 2.92936308 |
| AT5G64580  | AAA-type ATPase family protein; FUNCTIONS IN: nucleoside-triphosphatase activity, metalloendopeptidase activity, nucleotide binding, ATP binding; INVOLVED IN: embryo development; LOCATED IN: chloroplast, chloroplast envelope                                | N.D.                                           | 0.99913333                           | N.D.                                           | 0.26546667                           | not detected                   | n.a.                                  | n.a.                           | n.a.                           | infinite             | 0.6323             | 2.75302657 |
| AT5G42480  | Shows homology to the cyanobacterial cell division protein Ftn2, mutant only has two mesophyll cell chloroplasts. Protein was localized to a ring at the center of the chloroplasts.                                                                            | N.D.                                           | 0.9325                               | N.D.                                           | 0.18863333                           | not detected                   | n.a.                                  | n.a.                           | n.a.                           | infinite             | 0.56056667         | 2.4407005  |
| AT2G36160  | Ribosomal protein S11 family protein; FUNCTIONS IN: structural constituent of ribosome; INVOLVED IN: translation; LOCATED IN: cytosolic small ribosomal subunit, cytosolic ribosome, plasma membrane, chloroplast, membrane;                                    | N.D.                                           | 0.846                                | N.D.                                           | 0.2729                               | not detected                   | n.a.                                  | n.a.                           | n.a.                           | infinite             | 0.55945            | 2.43583855 |
| AT3G01290  | SPFH/Band 7/PHB domain-containing membrane-associated protein family; INVOLVED IN: N-terminal protein myristoylation; LOCATED IN: mitochondrion, plasma membrane, vacuole, membrane                                                                             | N.D.                                           | 0.51386667                           | N.D.                                           | 0.59723333                           | not detected                   | n.a.                                  | n.a.                           | n.a.                           | infinite             | 0.55555            | 2.14885799 |
| AT5G03910  | member of ATH subfamily                                                                                                                                                                                                                                         | N.D.                                           | 0.8718                               | N.D.                                           | 0.23696667                           | not detected                   | n.a.                                  | n.a.                           | n.a.                           | infinite             | 0.55438333         | 2.41377834 |
| AT5G56030  | A member of heat shock protein 90 (HSP90) gene family. Expressed in all tissues and abundant in root apical meristem, pollen and tapetum. Expression is NOT heat-induced but induced by IAA and NaCl. Interacts with HsfA1d in the cytosol and the nucleus and  | N.D.                                           | 1.0272                               | N.D.                                           | 0.04696667                           | not detected                   | n.a.                                  | n.a.                           | n.a.                           | infinite             | 0.53708333         | 2.33845435 |
| AT5G14030  | translocon-associated protein beta (TRAPB) family protein; FUNCTIONS IN: molecular_function unknown; INVOLVED IN: biological_process unknown;                                                                                                                   | N.D.                                           | 0.8145                               | N.D.                                           | 0.18113333                           | not detected                   | n.a.                                  | n.a.                           | n.a.                           | infinite             | 0.49781667         | 2.16748776 |
| AT2G19730  | Ribosomal L28e protein family; FUNCTIONS IN: structural constituent of ribosome; INVOLVED IN: translation, ribosome biogenesis; LOCATED IN: 6 components                                                                                                        | N.D.                                           | 0.72103333                           | N.D.                                           | 0.2547                               | not detected                   | n.a.                                  | n.a.                           | n.a.                           | infinite             | 0.48786667         | 2.12416558 |
| AT4G23940  | Encodes FtsH1. Localizes to the chloroplast envelope membrane. Functions in chloroplast biogenesis and division.                                                                                                                                                | N.D.                                           | 0.72396667                           | N.D.                                           | 0.25003333                           | not detected                   | n.a.                                  | n.a.                           | n.a.                           | infinite             | 0.487              | 2.12039212 |
| AT5G45775  | Ribosomal L5P family protein; FUNCTIONS IN: structural constituent of ribosome; INVOLVED IN: translation; LOCATED IN: cytosolic large ribosomal subunit, vacuole                                                                                                | N.D.                                           | 0.73806667                           | N.D.                                           | 0.22373333                           | not detected                   | n.a.                                  | n.a.                           | n.a.                           | infinite             | 0.4809             | 2.09383279 |
| AT3G61260  | Remorin family protein; FUNCTIONS IN: binding; INVOLVED IN: biological_process unknown; LOCATED IN: plasma membrane, vacuole; EXPRESSED IN: 24 plant structures; EXPRESSED DURING: 16 growth stages; CONTAINS InterPro DOMAIN/s: Remorin, C-terminal (InterPro: | N.D.                                           | 2.45243333                           | N.D.                                           | 1.38516667                           | not detected                   | 0.07786667                            | 31.4952911                     | 17.7889555                     | 24.6421233           | 1.9188             | 8.35443203 |
| AT3G17970  | Integral chloroplast outer membrane protein. Belongs to one of the 36 carboxylate clamp (CC)-tetrapeptide repeat (TPR) proteins (Prasad 2010, Pubmed ID: 20856808) with potential to interact with Hsp90/Hsp70 as co-chaperones.                                | N.D.                                           | 1.86883333                           | N.D.                                           | 0.5175                               | AT3G17970                      | 0.109733333                           | 17.0306804                     | 4.71597813                     | 10.8733293           | 1.19316667         | 5.19503326 |
| AT5G05000  | Outer membrane GTPase protein that may function in import of nuclear encoded proteins into the chloroplast. Phosphorylation of the G-domains regulate translocon assembly.                                                                                      | N.D.                                           | 3.00213333                           | N.D.                                           | 1.28286667                           | AT5G05000                      | 0.216633333                           | 13.858132                      | 5.92183413                     | 9.88998307           | 2.1425             | 9.32841913 |
| AT5G42020  | Luminal binding protein (BIP2) involved in polar nuclei fusion during proliferation of endosperm nuclei.                                                                                                                                                        | N.D.                                           | 1.8882                               | N.D.                                           | 0.65423333                           | AT5G42020                      | 0.1303                                | 14.4911742                     | 5.02097723                     | 9.75607572           | 1.27121667         | 5.53486202 |
| ATCG01130  | YCF1.2; FUNCTIONS IN: protein binding; LOCATED IN: chloroplast, membrane; EXPRESSED IN: cultured cell, leaf; CONTAINS InterPro DOMAIN/s: Ycf1 (InterPro:IPR008896); BEST Arabidopsis thaliana protein match is: Ycf1 protein (TAIR:ATCG01000.1).                | N.D.                                           | 3.65786667                           | N.D.                                           | 0.7971                               | ATCG01130                      | 0.26536667                            | 13.784198                      | 3.00376837                     | 8.39398317           | 2.22748333         | 9.69843554 |
| AT3G49860  | A member of ARF-like GTPase family. A thaliana has 21 members, in two subfamilies, ARF and ARF-like (ARL) GTPases.                                                                                                                                              | N.D.                                           | 0.51023333                           | N.D.                                           | 0.1792                               | AT3G49860                      | 0.071166667                           | 7.16955504                     | 2.51803279                     | 4.84379391           | 0.34471667         | 1.5008922  |
| AT1G10510  | embryo defective 2004 (emb2004); INVOLVED IN: embryo development ending in seed dormancy; LOCATED IN: mitochondrion, chloroplast, plastid, chloroplast envelope                                                                                                 | N.D.                                           | 1.73596667                           | N.D.                                           | 0.48246667                           | AT1G10510                      | 0.336333333                           | 5.16144698                     | 1.43448959                     | 3.29796829           | 1.10921667         | 4.82951597 |
| AT1G02280  | Encodes a GTP-binding GTP-ase. Component of the chloroplast protein import machinery. Required for import of POR B into plastids. Toc33 phosphorylation may not play an important role in vivo.                                                                 | N.D.                                           | 3.2534                               | N.D.                                           | 0.7088                               | AT1G02280                      | 0.653133333                           | 4.98121874                     | 1.08523017                     | 3.03322446           | 1.9811             | 8.62568548 |
| AT3G18420  | Protein prenyltransferase superfamily protein; FUNCTIONS IN: binding; INVOLVED IN: biological_process unknown; LOCATED IN: chloroplast, chloroplast envelope                                                                                                    | N.D.                                           | 0.45073333                           | N.D.                                           | 0.30356667                           | AT3G18420                      | 0.145233333                           | 3.10351159                     | 2.09019968                     | 2.59685563           | 0.37715            | 1.64210655 |

|           |                                                                                                                                                                                                                                                         |      |            |              |            |           |             |            |            |            |            |            |
|-----------|---------------------------------------------------------------------------------------------------------------------------------------------------------------------------------------------------------------------------------------------------------|------|------------|--------------|------------|-----------|-------------|------------|------------|------------|------------|------------|
| AT2G43630 | FUNCTIONS IN: molecular_function unknown; INVOLVED IN: biological_process unknown; LOCATED IN: chloroplast thylakoid membrane, chloroplast, nucleus, chloroplast envelope                                                                               | N.D. | 1.4308     | N.D.         | 0.65796667 | AT2G43630 | 0.484433333 | 2.95355398 | 1.35821923 | 2.1558866  | 1.04438333 | 4.54723242 |
| AT5G14040 | Encodes a mitochondrial phosphate transporter. Modulates plant responses to salt stress.                                                                                                                                                                | N.D. | 0.89613333 | N.D.         | 0.25456667 | AT5G14040 | 0.3131      | 2.86213137 | 0.81305227 | 1.83759182 | 0.57535    | 2.50506695 |
| AT3G46740 | Component of the translocon outer membrane (TOC) complex. Forms the outer envelope translocation channel (beta-barrel). Plays a role in preprotein conductance. Imported into chloroplast. Expressed in young dividing photosynthetic tissues.          | N.D. | 8.04253333 | N.D.         | 1.84283333 | AT3G46740 | 2.8509      | 2.82105066 | 0.64640406 | 1.73372736 | 4.94268333 | 859.074187 |
| AT5G23040 | Encodes a protein that enables protochlorophyllide's binding to pPORA's transit sequence, regulating pPORA's translocation into the plastid stroma, and blocking movement of the translocating polypeptide chain back into the cytosol.                 | N.D. | 0.99363333 | N.D.         | 0.31663333 | AT5G23040 | 0.4071      | 2.44075985 | 0.77777778 | 1.60926881 | 0.65513333 | 2.85244262 |
| AT3G12580 | heat shock protein 70 (HSP70); FUNCTIONS IN: ATP binding; INVOLVED IN: in 9 processes; LOCATED IN: cytosol, mitochondrion, cell wall, plasma membrane.                                                                                                  | -    | 0.2278     | N.D.         | 0.16866667 | AT3G12580 | 0.1409      | 1.61674947 | 1.19706648 | 1.40690797 | 0.19823333 | 0.86310554 |
| AT4G00630 | Encodes a K(+)/H(+) antiporter that modulates monovalent cation and pH homeostasis in plant chloroplasts or plastids.                                                                                                                                   | N.D. | 1.0542     | N.D.         | 0.2698     | AT4G00630 | 0.47266667  | 2.2303244  | 0.57080395 | 1.40056417 | 0.662      | 2.88234001 |
| AT2G43950 | Constitutes a peptide sensitive ion channel in chloroplast outer membranes. Accumulates in germinating seeds and developing embryos.                                                                                                                    | N.D. | 2.5375     | N.D.         | 0.7826     | AT2G43950 | 1.199833333 | 2.11487707 | 0.65225726 | 1.38356716 | 1.66005    | 7.22783766 |
| AT3G10840 | alpha/beta-Hydrolases superfamily protein; FUNCTIONS IN: hydrolase activity, catalytic activity; LOCATED IN: chloroplast envelope                                                                                                                       | N.D. | 0.81403333 | N.D.         | 0.29863333 | AT3G10840 | 0.4654      | 1.74910471 | 0.64167025 | 1.19538748 | 0.55633333 | 2.42226862 |
| AT5G23890 | LOCATED IN: mitochondrion, chloroplast thylakoid membrane, chloroplast, plastid, chloroplast envelope; EXPRESSED IN: 24 plant structures; EXPRESSED DURING: 14 growth stages; CONTAINS InterPro DOMAIN(s): S-layer homology domain (InterPro:IPRO01119) | N.D. | 1.30993333 | N.D.         | 0.239      | AT5G23890 | 0.65396667  | 2.00305826 | 0.36546205 | 1.18426016 | 0.77446667 | 3.37201852 |
| AT1G77590 | Encodes major plastidic long chain acyl-CoA synthetase with a slight substrate preference of oleic acid over any of the other fatty acids.                                                                                                              | N.D. | 1.2093     | N.D.         | 0.30783333 | AT1G77590 | 0.704       | 1.71775568 | 0.43726326 | 1.07750947 | 0.75856667 | 3.30279011 |
| AT3G01500 | Encodes a putative beta-carbonic anhydrase betaCA1. Together with betaCA4 (At1g70410) regulates CO2-controlled stomatal movements in guard cells.                                                                                                       | N.D. | 2.4029     | 0.5960333333 | 32.4081667 | AT3G01500 | 16.37386667 | 0.14675214 | 1.97926167 | 1.06300691 | 17.4055333 | 75.783482  |

**Table S1:** Identification of KOC-interacting proteins and quantification by MSE. Proteins interacting with KOC were quantified by MSE and their quantities related to their abundance in a chloroplast reference proteome. The enrichment index is arbitrary and calculated from the abundance of the protein in the eluates divided by their abundance in complete chloroplasts without prior enrichment. Only those proteins identified in two biological replicates, no detection in the negative controls, an enrichment index above 1 and an absolute abundance of at least 2% of the bait were retained in the list and are displayed here.

| Primer name             | Primer sequence                                         |
|-------------------------|---------------------------------------------------------|
| KOC1_NheI_F             | 5'-GAGAGAGCTAGCATGGCTTCAAAGATTATT-3'                    |
| KOC1_NotI_R             | 5'-TCTCTCGCGGCCGCAAAGAACAAGCCA-3'                       |
| KOC1_NcoI_F             | 5'-GAGACCATGGCTTCAAAGATTATTGC-3'                        |
| KOC1_NcoI_R             | 5'- TCTCCCATGGCTTGCAGATGATCCTTTGAA-3'                   |
| KOC1_NcoI_R2            | 5'- TCTCTCGCGGCCGCATCCTCCAGATGTTGA-3'                   |
| KOC1_FL_NcoI_F          | 5'-TACCATGGCTAGCATGGCTTCAAAG-3'                         |
| KOC1_FL_XbaI_R          | 5'-TCTCTAGACTAAAAGAACAAGCCATTTAG-3'                     |
| LBb1.3 (Salk Institute) | 5'-ATTTTGCCGATTTTCGGAAC-3'                              |
| koc1-1_LP               | 5'- CAGGGGAGTCTCTAGTATCA-3'                             |
| koc1-1_RP               | 5'-TAG CAC AAA TCC ATC TGG GTC-3'                       |
| koc1-2_LP               | 5'-AGAACATGGATGTGCCAGAAG-3'                             |
| koc1-2_RP               | 5'-CGCTGCATATAACCATGTGATG-3'                            |
| Toc159-StuI-F           | 5'-CAAATTCTCTATTGAGGCCTCAAGAACCATTG-3'                  |
| Toc159-cmyc-Gib-R       | 5'-CTTCTTCAGAGATCAGTTTCTGTTCTACGTACATGCTGTACTTGTC-3'    |
| cmyc-uniGib-R           | 5'-CTGCAGGTCGACTCTAGATTACAGATCTTCTTCAGAGATC-3'          |
| attB-KOC1-FW            | 5'- ACAAGTTTGTACAAAAAAGCAGGCTCCGCTTCAAAGATTATTGCTGG-3'  |
| attB-KOC1-REV           | 5'- ACCACTTTGTACAAGAAAGCTGGGTCTAAAAGAACAAGCCATT-3'      |
| attB-EMB2004-FW         | 5'-GGGGACAAGTTTGTACAAAAAAGCAGGCTATGGCTTCTTCTTCCACCAG-3' |
| attB-EMB2004-REV        | 5'-GGGGACCACTTTGTACAAGAAAGCTGGGTGGAAGAAAATTTCTACTTCC-3' |

**TABLE S2:** List of primers used for cloning and genotyping
